# Supplementary material for: Medical Geology and Health: An Approach to Address Diseases Related to Natural Environment-Reviewing the Ghanaian Situation
Source: Preprints.org preprint supplement (doi:10.20944/preprints201806.0251.v1), 2018-06-15
Supplement: Supplementary file 1 [file supplementary]

**Table 4** Source exposure and pathways of trace elements to humans and animals from the surface environment

| **Source** | **Soil** | **Water** | **Food** | **Dust** |
| --- | --- | --- | --- | --- |
| **Exposure** | Essential and Toxic Elements | Essential and Toxic Elements | Essential and Toxic Elements | Essential and Toxic Elements |
| **Pathway** | Ingestion, Dermal Contact | Ingestion, Dermal Contact | Ingestion | Inhalation, Dermal Contact |
