# Supplementary material for: Medical Geology and Health: An Approach to Address Diseases Related to Natural Environment-Reviewing the Ghanaian Situation
Source: Preprints.org preprint supplement (doi:10.20944/preprints201806.0251.v1), 2018-06-15
Supplement: Supplementary file 2 [file Table 1.docx]

**Table 2** Arsenic concentration ranges (mg/kg) in sulphide and oxide minerals in worldwide rocks

| Mineral | Minimum (mg/kg) | Maximum (mg/kg) |
| --- | --- | --- |
| Sulphide Minerals |  |  |
| Pyrite | 100 | 120000 |
| Pyrrhotite | 5 | 100 |
| Marcasite | 20 | 276000 |
| Galena | 5 | 10000 |
| Sphalerite | 5 | 17000 |
| Chalcopyrite | 10 | 5000 |
| Oxide Minerals |  |  |
| Haematite | ≤ 29000 | |
| Iron (III) oxyhydroxides | ≤ 76000 | |
| Magnetite | 27 | 41 |
| Maghemite | ≤ 186000 | |
