# Supplementary material for: Medical Geology and Health: An Approach to Address Diseases Related to Natural Environment-Reviewing the Ghanaian Situation
Source: Preprints.org preprint supplement (doi:10.20944/preprints201806.0251.v1), 2018-06-15
Supplement: Supplementary file 4 [file Table 2.docx]

**Table 2** Variation of fluoride concentration (mg/l) in drinking water draining the Birimian rocks in Upper East region of Ghana

| **Geology** | n | Minimum | Mean | Maximum | **% > Accepted Value** |
| --- | --- | --- | --- | --- | --- |
| Bongo & Tongo Granite | 46 | 0.09 | 1.88 | 4.4 | 54 |
| Sekoti Granodiorite | 8 | 0.86 | 1.56 | 3.2 | 38 |
| Irimian granodiorite, adamellite and gneiss | 85 | 0.15 | 0.72 | 3.6 | 13 |
| Birimian greenstone (metavolcanic and metasediments) | 46 | 0.13 | 0.55 | 3.6 | 9 |

Source: Apambire et al.,
